# Supplementary material
Source: publisher site journal article supplement (https://www.dovepress.com/get_supplementary_file.php?f=317147.docx)

**Figure S1. A correlation analysis to investigate the correlation between IL-2 (A), IL-6 (B), IL-10 (C), IL-4 (D), INF-γ (E), and TNF-α (F) and delta NIHSS 0-24 h.**


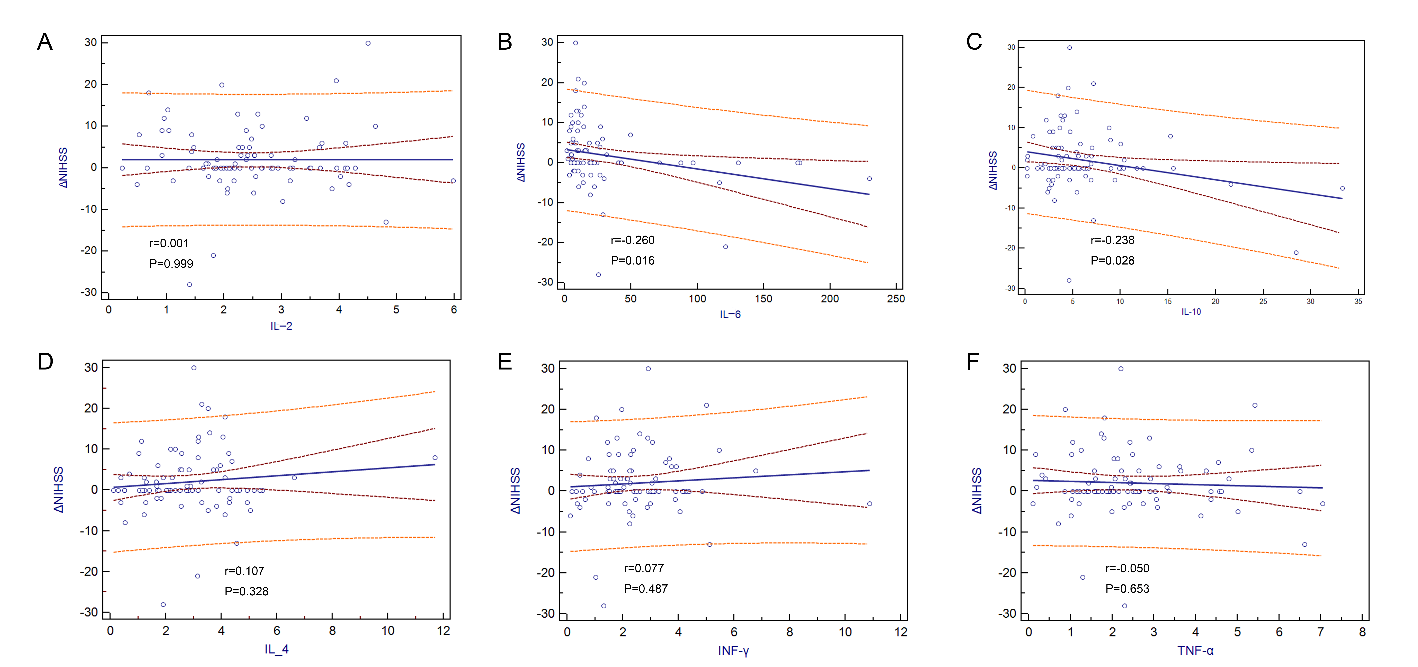


**Figure S2. A correlation analysis to explore the association between IL-2 (A), IL-6 (B), IL-10 (C), IL-4 (D), INF-γ (E), and TNF-α (F) and 90-day modified Rankin scale (mRS).**


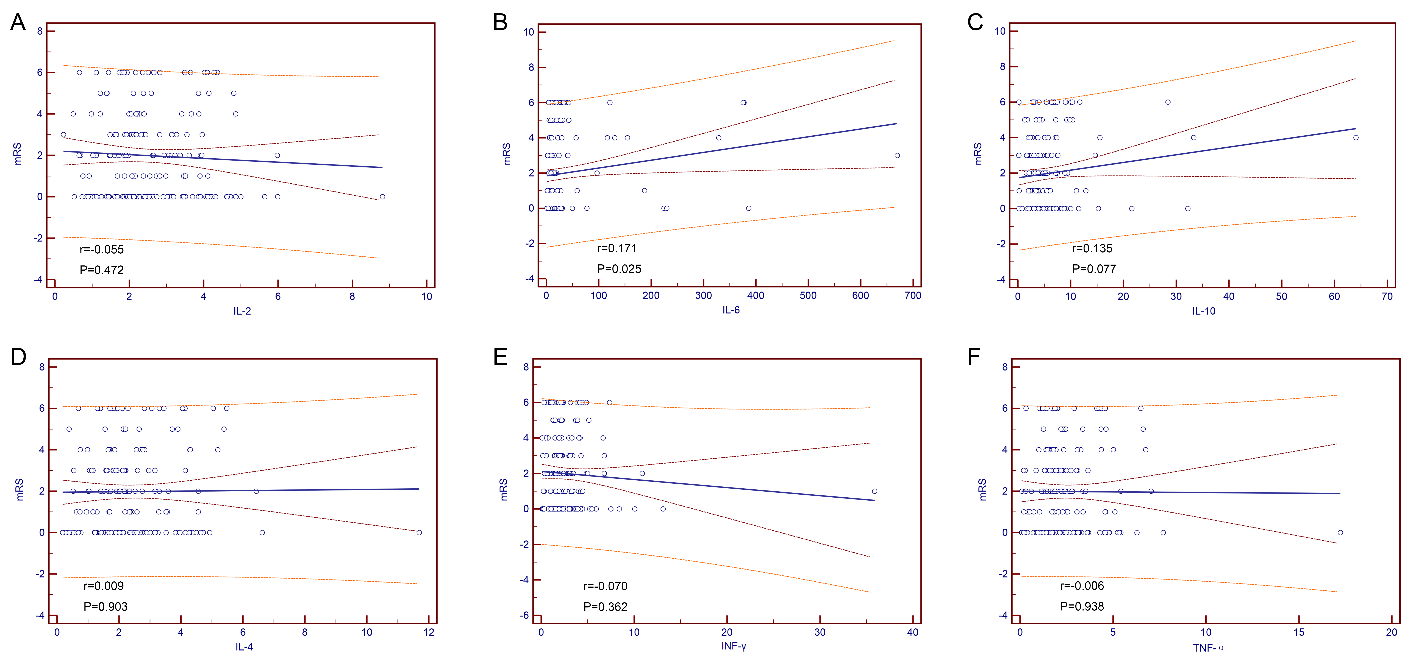

Supplement: Supplementary file 1 [file get_supplementary_file.php]
